# Supplementary material for: The Osteogenesis Effect and Underlying Mechanisms of Local Delivery of gAPN in Extraction Sockets of Beagle Dogs
Source: Int J Mol Sci. 2015 Oct 20;16(10):24946–64. doi: 10.3390/ijms161024946 (PMC4632783; doi:10.3390/ijms161024946)
Supplement: Supplementary file 1 [file ijms-16-24946-s001.pdf]

# Supplementary Information

**Table S1.** Expression level of Osteocalcin, BSP and Col-1 in the socket sections of the different groups

| Target Protein | Control  | Bio-Oss    | BMP2       | APN        |
|----------------|----------|------------|------------|------------|
| Osteocalcin    | 1 ± 0.25 | 2.1 ± 0.69 | 5.8 ± 0.30 | 5.9 ± 0.27 |
| BSP            | 1 ± 0.27 | 2.6 ± 0.32 | 4.0 ± 0.47 | 4.1 ± 0.11 |
| Col-1          | 1 ± 0.27 | 1.9 ± 0.35 | 5.8 ± 0.98 | 5.6 ± 0.92 |

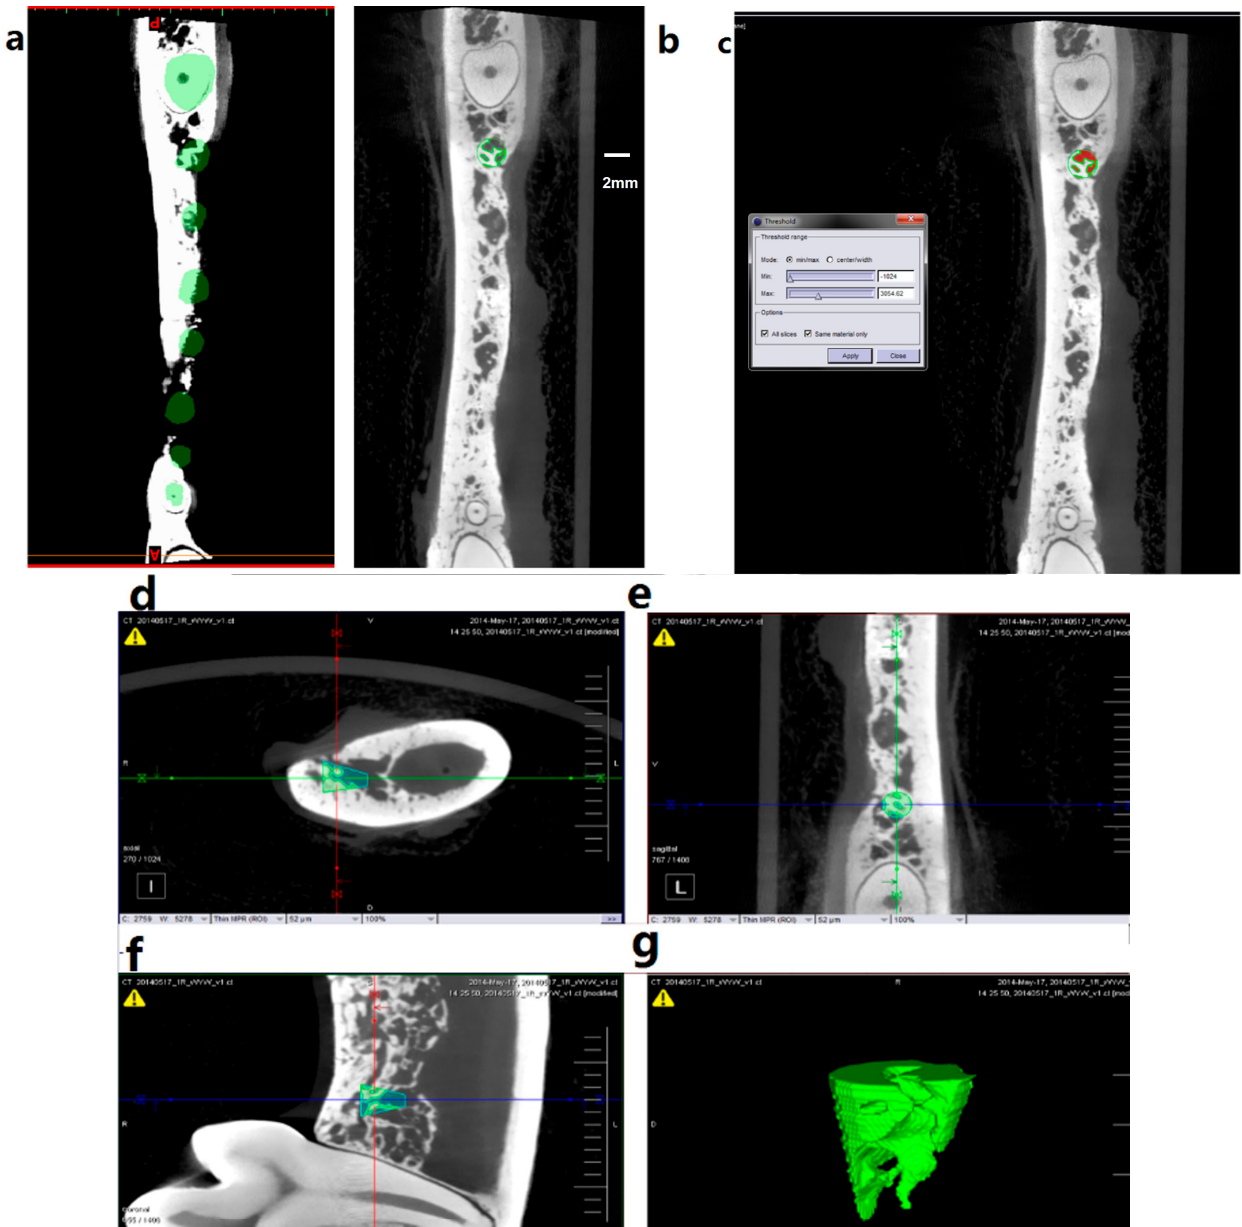

**Figure S1.** The choosing of ROI: (a) the transparency overlay of the superimposed 3D CBCT root model and  $\mu$ CT model to help locate (b) the position of ROI; (c) the threshold to determine trabecular bone and bone marrow, the threshold was 3054.62 for all specimen. The ROI was a root-shaped region with a 2 and 1 mm diameter on the upper and lower side of alveolar ridge respectively and with a height of 3 mm, shown in (d–f); (g) the 3D reconstruction of trabecular bone.
